# Supplementary material for: Microbial Consortium Associated with Crustacean Shells Composting
Source: MDPI journal article supplement (doi:10.3390/microorganisms10051033), 2022-05-16
Supplement: s1 [file s1]

## Supplementary Figures

**Figure S1:** Microbial classes identified in the study. A, bacterial 16S rRNA; B, fungal ITS.

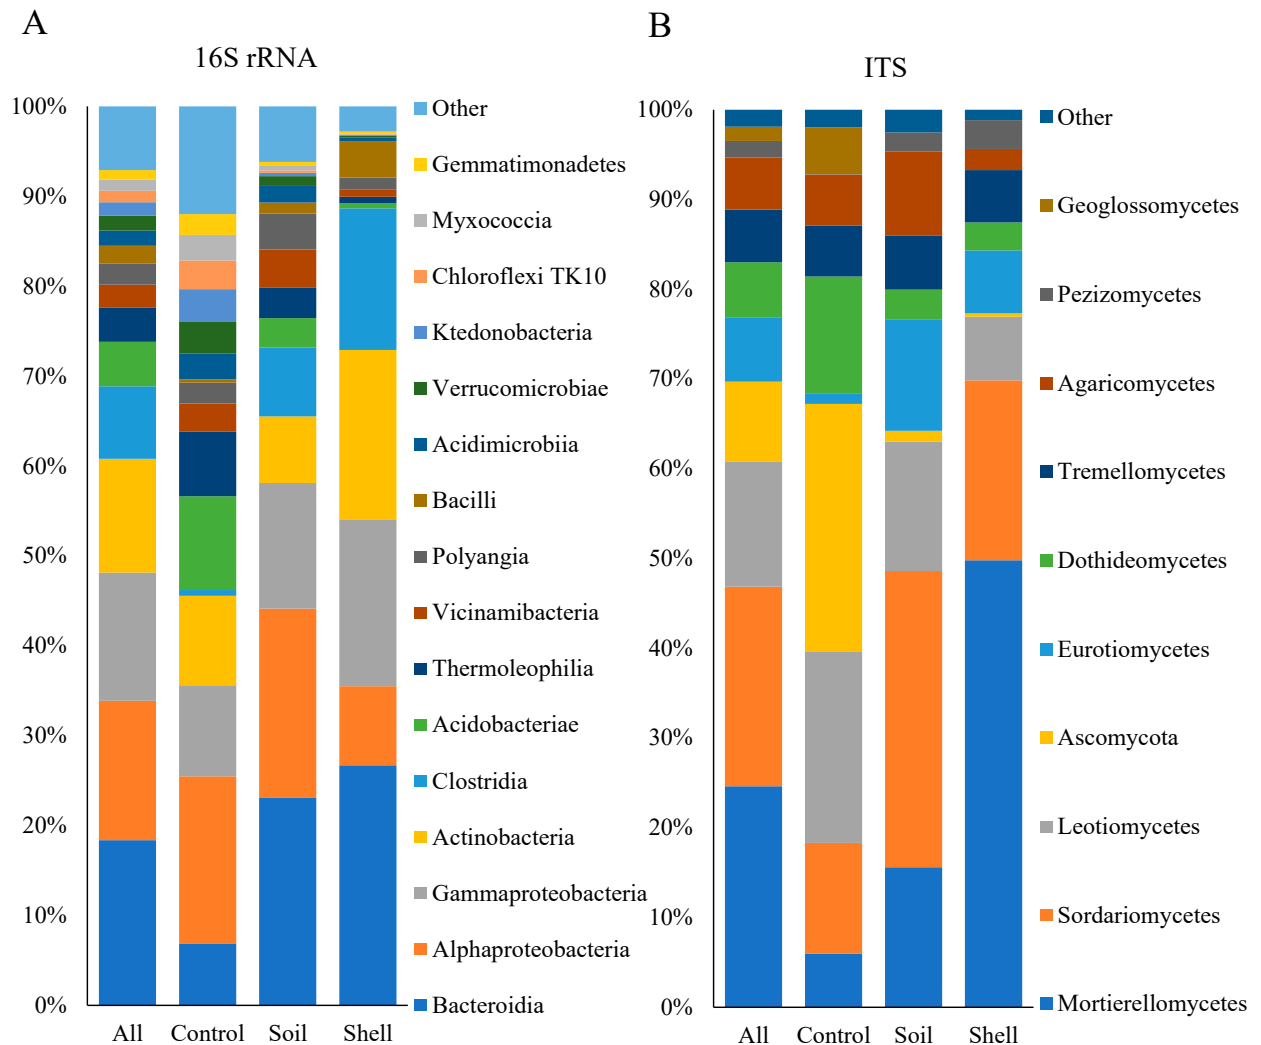

**Figure S2:** Microbial families identified in the core microbiomes. A, bacterial 16S rRNA; B, fungal ITS.

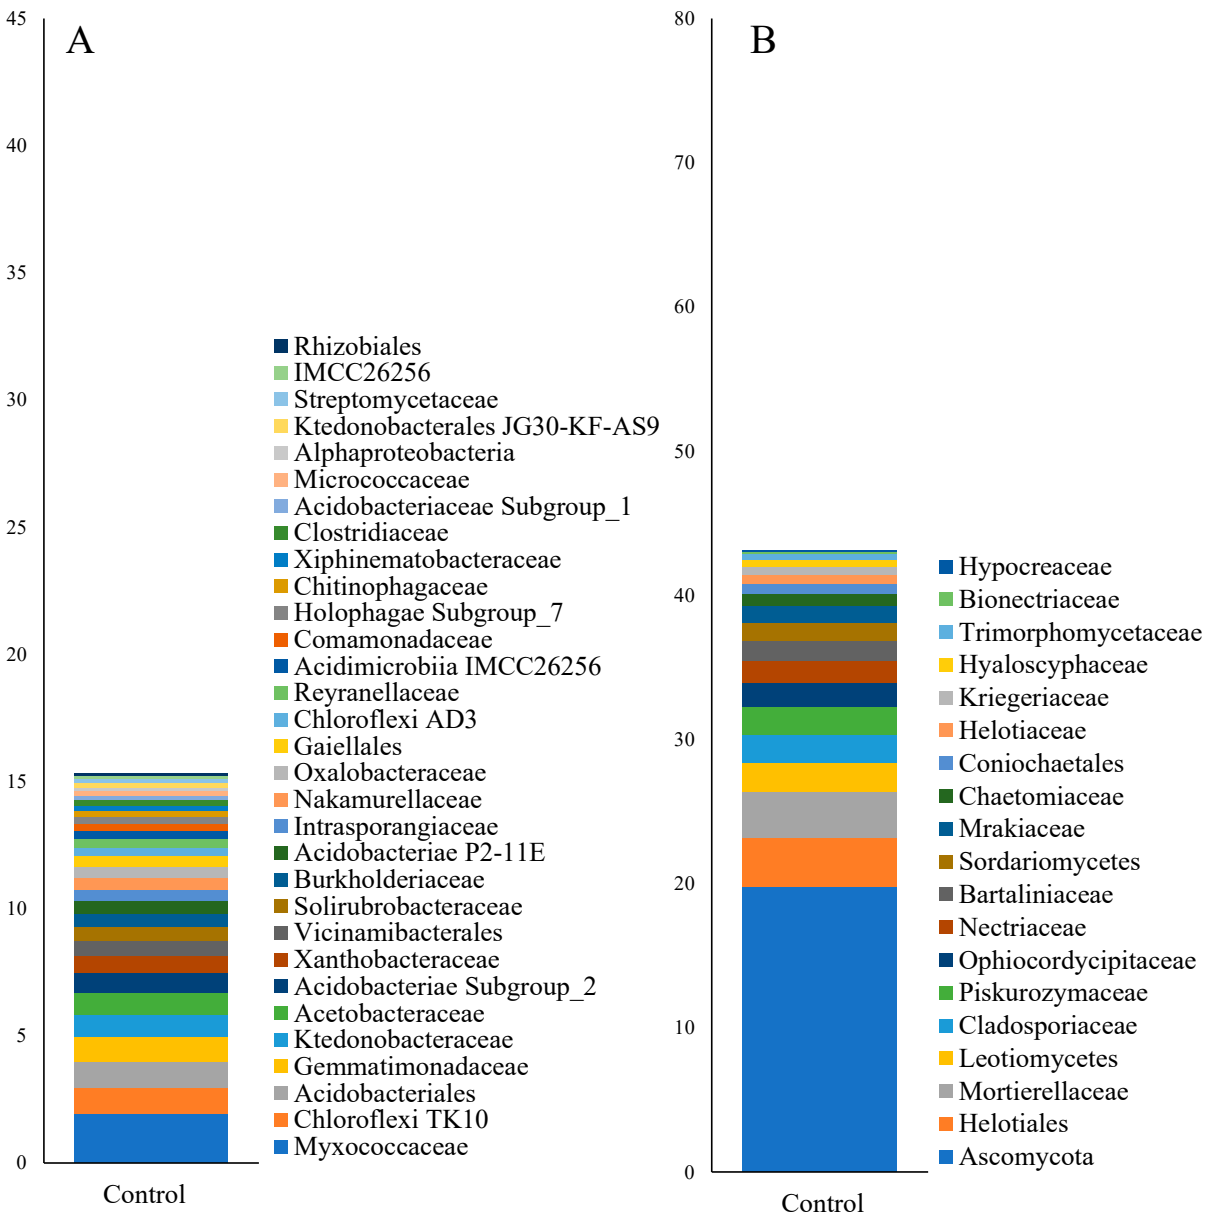

## Supplementary Tables

**Table S1:** Variation in sample groupings as explained by weighted UniFrac dissimilarity distances.

|                               | 16S rRNA | ITS2     |
|-------------------------------|----------|----------|
| <b>Control x Soil x Shell</b> | 0.699*** | 0.663*** |
| <b>Control x Soil</b>         | 0.737*** | 0.583*** |
| <b>Control x Shell</b>        | 0.681*** | 0.690*** |
| <b>Soil x Shell</b>           | 0.417*** | 0.492*** |

*Adonis tests were used to assess whether beta-diversity is related to sample groupings, 999 permutations, R<sup>2</sup>, \*\*\*P < 0.001.*
